# Supplementary material for: Degradation Profiling of Nardosinone at High Temperature and in Simulated Gastric and Intestinal Fluids
Source: MDPI journal article supplement (doi:10.3390/molecules28145382), 2023-07-13
Supplement: s1 [file s1]

## Supplementary Material

### Degradation Profiling of Nardosinone at High Temperature, and in Simulated Gastric and Intestinal Fluids

Bian-Xia Xue<sup>a,†</sup>, Tian-Tian Yang<sup>a,†</sup>, Ru-Shang He<sup>a,†</sup>, Wen-Ke Gao<sup>a</sup>, Jia-Xin Lai<sup>a</sup>, Si-Xia Liu<sup>a</sup>, Cong-Yan Duan<sup>a</sup>, Shao-Xia Wang<sup>a</sup>, Hui-Juan Yu<sup>a</sup>, Wen-Zhi Yang<sup>a</sup>, Li-Hua Zhang<sup>a,\*</sup>, Qi-Long Wang<sup>a,\*</sup>, Hong-Hua Wu<sup>a,b,\*</sup>

<sup>a</sup> National Key Laboratory of Chinese Medicine Modernization, State Key Laboratory of Component-Based Chinese Medicine, Tianjin University of Traditional Chinese Medicine, 10 Poyanghu Road, West Area, Tuanbo New Town, Jinghai District, Tianjin 301617, China

<sup>b</sup> Tianjin Key Laboratory of Therapeutic Substance of Traditional Chinese Medicine, Tianjin University of Traditional Chinese Medicine, 10 Poyanghu Road, West Area, Tuanbo New Town, Jinghai District, Tianjin 301617, China

---

**\* Corresponding authors:**

Li-Hua Zhang, Institute of Traditional Chinese Medicine, Tianjin University of Traditional Chinese Medicine, 10 Poyanghu Road, West Area, Tuanbo New Town, Jinghai District, Tianjin, 301617, China  
Tel./fax: +86-022-59791830  
E-mail address: zhanglihua200061@163.com (L.-H. Zhang).

Qi-Long Wang, Institute of Traditional Chinese Medicine, Tianjin University of Traditional Chinese Medicine, 10 Poyanghu Road, West Area, Tuanbo New Town, Jinghai District, Tianjin, 301617, China  
E-mail address: wangqilong\_00@tjutcm.edu.cn (Q.-L. Wang).  
ORCID: <https://orcid.org/0000-0002-4375-991X>

Hong-Hua Wu, Institute of Traditional Chinese Medicine, Tianjin University of Traditional Chinese Medicine, 10 Poyanghu Road, West Area, Tuanbo New Town, Jinghai District, Tianjin, 301617, China  
Tel./fax: +86-022-59791833  
E-mail address: wuhonghua2011@tjutcm.edu.cn (H.-H. Wu).  
ORCID: <https://orcid.org/0000-0002-3089-4282>.

**† Co-first authors:**

B. X. Xue, T.-T. Yang and R.-S. He contributed equally to this work and should be considered co-first authors

| <b>Table of Contents</b>                                                                                                                                                                                                                                                                                                    | <b>Page</b> |
|-----------------------------------------------------------------------------------------------------------------------------------------------------------------------------------------------------------------------------------------------------------------------------------------------------------------------------|-------------|
| <b>Figure S1</b> Structures (a) and optimized conformers (b) for the ECD calculation of 2–deoxokanshone M                                                                                                                                                                                                                   | <b>2</b>    |
| <b>Figure S2</b> Structures (a) and optimized conformers (b) for the ECD calculation of 2–deoxokanshone L                                                                                                                                                                                                                   | <b>2</b>    |
| <b>Figure S3</b> Representative UPLC chromatograms of 2–deoxokanshone M incubated in HT and SGF–A                                                                                                                                                                                                                           | <b>3</b>    |
| <b>Figure S4</b> The stability of 2–deoxokanshone M in boiling water for 2 h. (a) Stacked UPLC chromatograms of 2–deoxokanshone M in boiling water for 0, 30, 60, and 120 min (b); the line graph of the relative content change of nardosinone and 2–deoxokanshone M in boiling water                                      | <b>3</b>    |
| <b>Figure S5</b> <sup>1</sup> H NMR (600 MHz, CD <sub>3</sub> OD) spectrum of 2–deoxokanshone M                                                                                                                                                                                                                             | <b>4</b>    |
| <b>Figure S6</b> <sup>13</sup> C NMR (150 MHz, CD <sub>3</sub> OD) spectrum of 2–deoxokanshone M                                                                                                                                                                                                                            | <b>4</b>    |
| <b>Figure S7</b> <sup>1</sup> H NMR (600 MHz, CD <sub>3</sub> OD) spectrum of the reaction mixture of 2–deoxokanshone M in 50% MeOH at 80°C for 48 h                                                                                                                                                                        | <b>5</b>    |
| <b>Figure S8</b> Representative UPLC chromatograms of nardosinone incubated in SGF (a), SGF–A (b) and SGF–B (c)                                                                                                                                                                                                             | <b>6</b>    |
| <b>Figure S9</b> The degradation rate and dynamic variations of nardosinone and degradation products under three different conditions for 108 h. (a) Degradation percent of nardosinone in three conditions; time-concentration curves of nardosinone and its main degradation products in SGF (b), SGF–A (c) and SGF–B (d) | <b>6</b>    |
| <b>Figure S10</b> Mass spectrum ion fragment of desoxo-narchinol A                                                                                                                                                                                                                                                          | <b>7</b>    |
| <b>Figure S11</b> Mass spectrum ion fragment of 2–deoxokanshone L                                                                                                                                                                                                                                                           | <b>7</b>    |
| <b>Figure S12</b> Mass spectrum ion fragment of nardosinonediol                                                                                                                                                                                                                                                             | <b>8</b>    |
| <b>Figure S13</b> Mass spectrum ion fragment of isonardosinone                                                                                                                                                                                                                                                              | <b>8</b>    |
| <b>Figure S14</b> Mass spectrum ion fragment of 2–deoxokanshone M                                                                                                                                                                                                                                                           | <b>9</b>    |
| <b>Figure S15</b> Mass spectrometry fragmentation pathway of desoxo-narchinol A (positive ion mode)                                                                                                                                                                                                                         | <b>10</b>   |
| <b>Figure S16</b> Mass spectrometry fragmentation pathway of 2–deoxokanshone L (positive ion mode)                                                                                                                                                                                                                          | <b>11</b>   |
| <b>Figure S17</b> Mass spectrometry fragmentation pathway of nardosinonediol (positive ion mode)                                                                                                                                                                                                                            | <b>12</b>   |
| <b>Figure S18</b> Mass spectrometry fragmentation pathway of isonardosinone (positive ion mode)                                                                                                                                                                                                                             | <b>13</b>   |
| <b>Figure S19</b> Mass spectrometry fragmentation pathway of 2–deoxokanshone M (positive ion mode)                                                                                                                                                                                                                          | <b>14</b>   |
| <b>Figure S20</b> The separation process diagram of nardosinone                                                                                                                                                                                                                                                             | <b>15</b>   |
| <b>Table S1</b> Characterization of nardosinone and its degradation products in three different conditions by using UHPLC-DAD/ESI–Q–TOF MS                                                                                                                                                                                  | <b>16</b>   |
| <b>Table S2</b> The detailed parameters of the NMR measurements                                                                                                                                                                                                                                                             | <b>19</b>   |

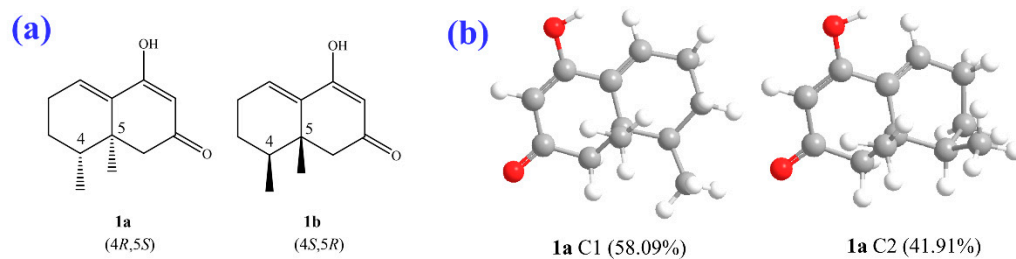

**Figure S1** Structures **(a)** and optimized conformers **(b)** for the ECD calculation of 2-deoxokanshone M

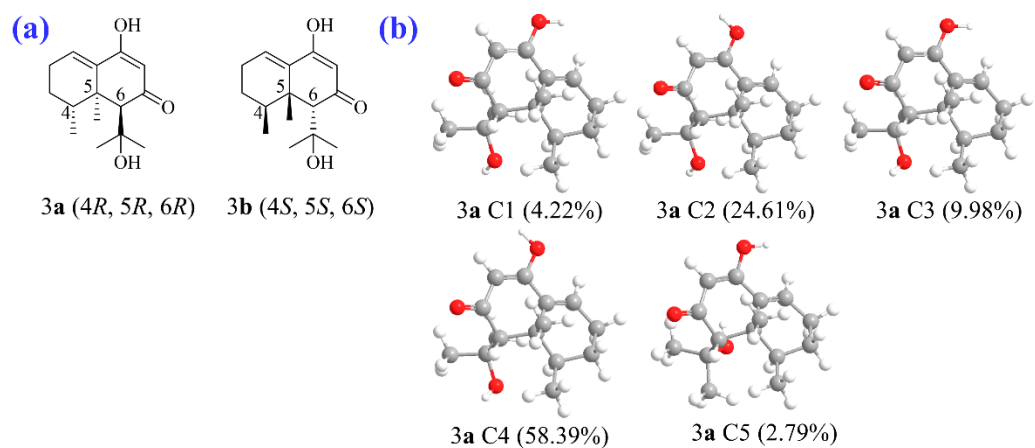

**Figure S2** Structures **(a)** and optimized conformers **(b)** for the ECD calculation of 2-deoxokanshone L

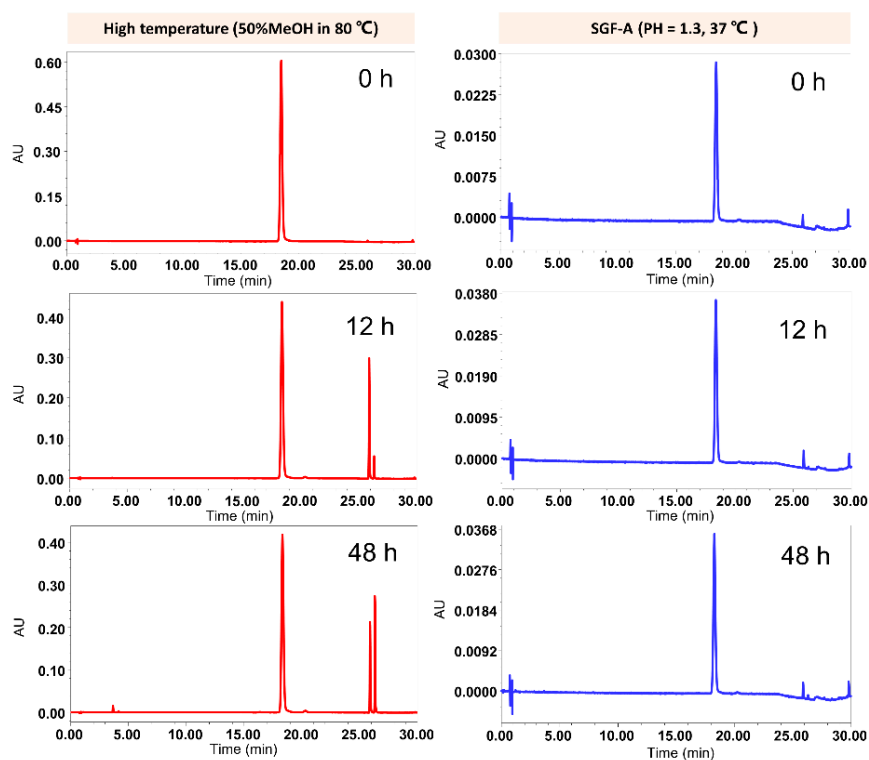

**Figure S3** Representative UPLC chromatograms of 2-deoxokanshone M incubated in HT and SGF-A

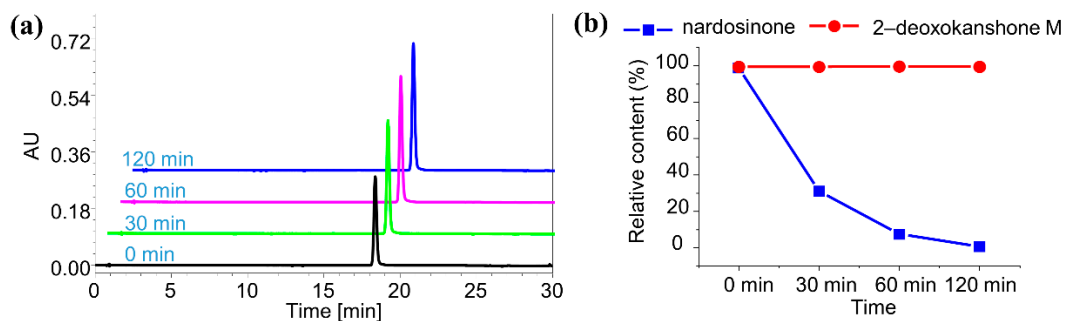

**Figure S4** The stability of 2-deoxokanshone M in boiling water for 2 h. (a) Stacked UPLC chromatograms of 2-deoxokanshone M in boiling water for 0, 30, 60, and 120 min (b); the line graph of the relative content change of nardosinone and 2-deoxokanshone M in boiling water

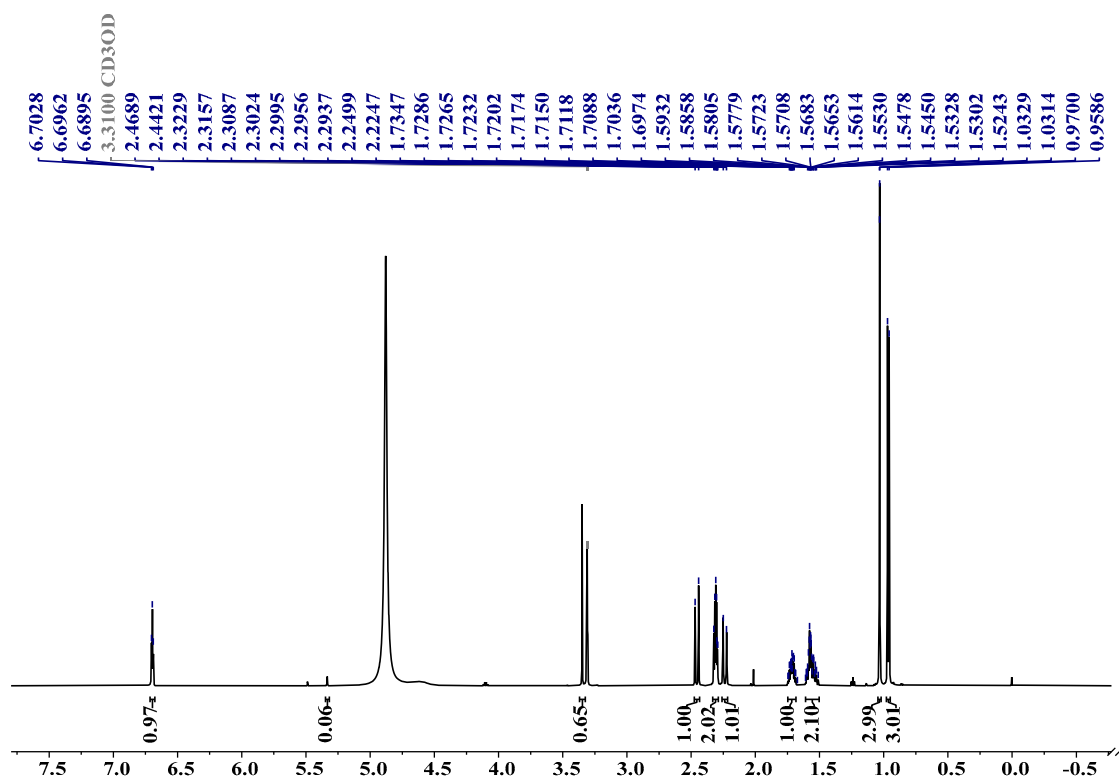

**Figure S5**  $^1\text{H}$  NMR (600 MHz,  $\text{CD}_3\text{OD}$ ) spectrum of 2-deoxokanshone M

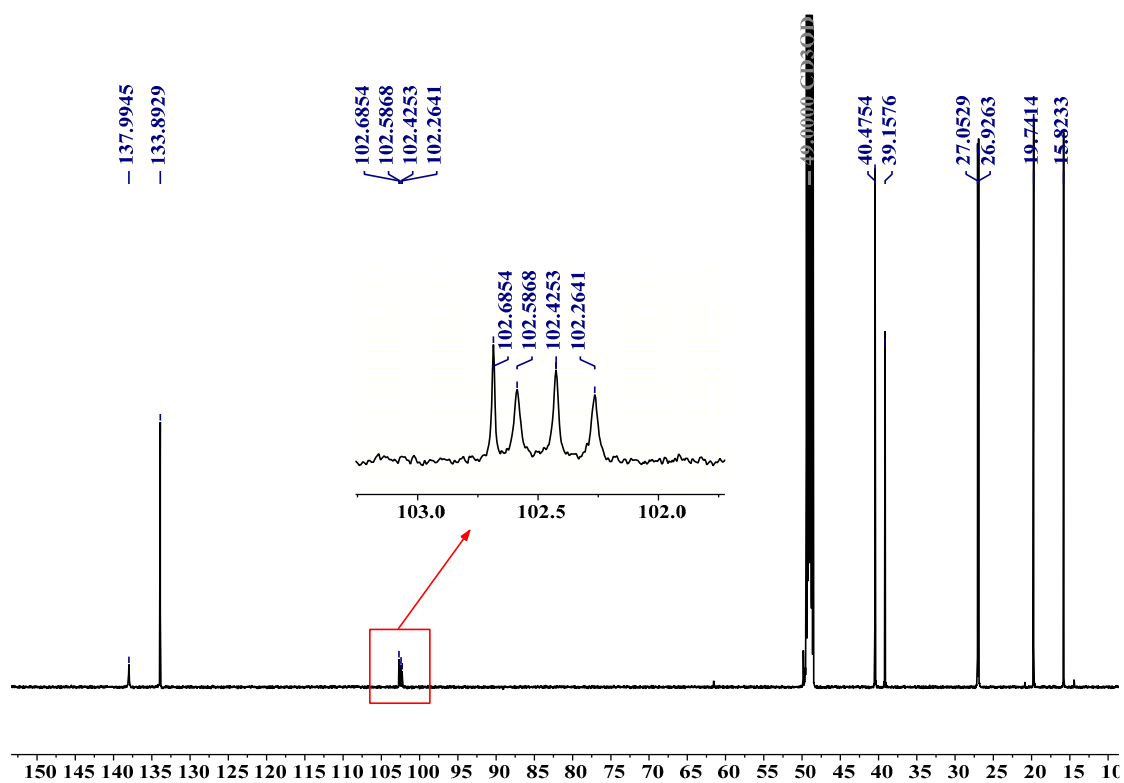

**Figure S6**  $^{13}\text{C}$  NMR (150 MHz,  $\text{CD}_3\text{OD}$ ) spectrum of 2-deoxokanshone M

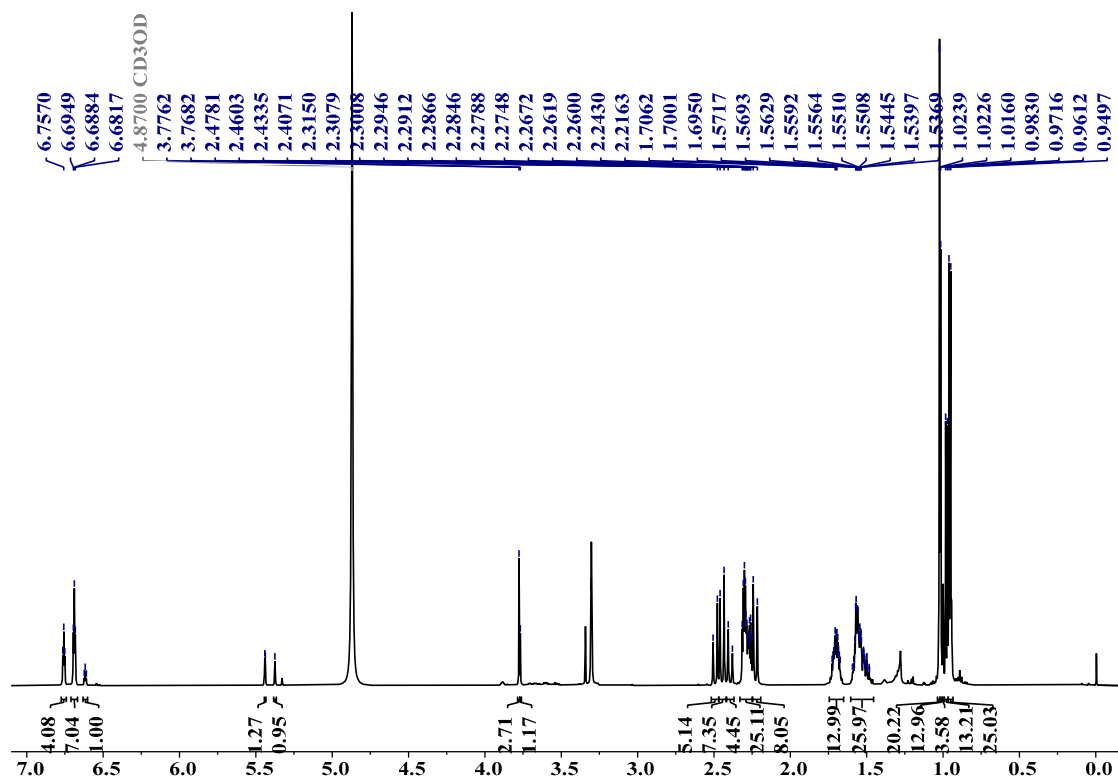

**Figure S7** <sup>1</sup>H NMR (600 MHz, CD<sub>3</sub>OD) spectrum of the reaction mixture of 2-deoxokanshone M in 50% MeOH at 80°C for 48 h

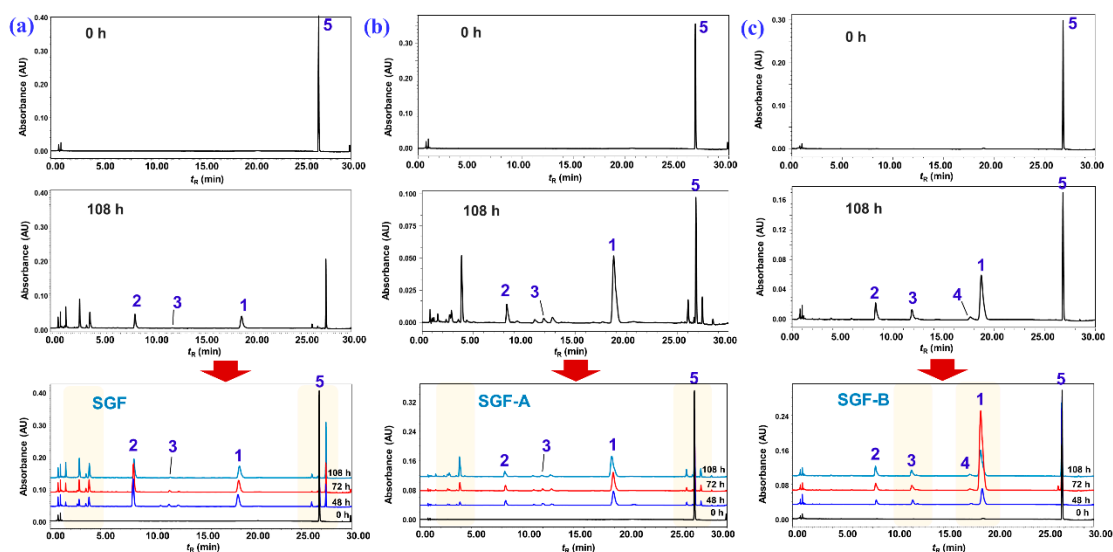

**Figure S8** Representative UPLC chromatograms of nardosinone incubated in SGF (a), SGF-A (b) and SGF-B (c)

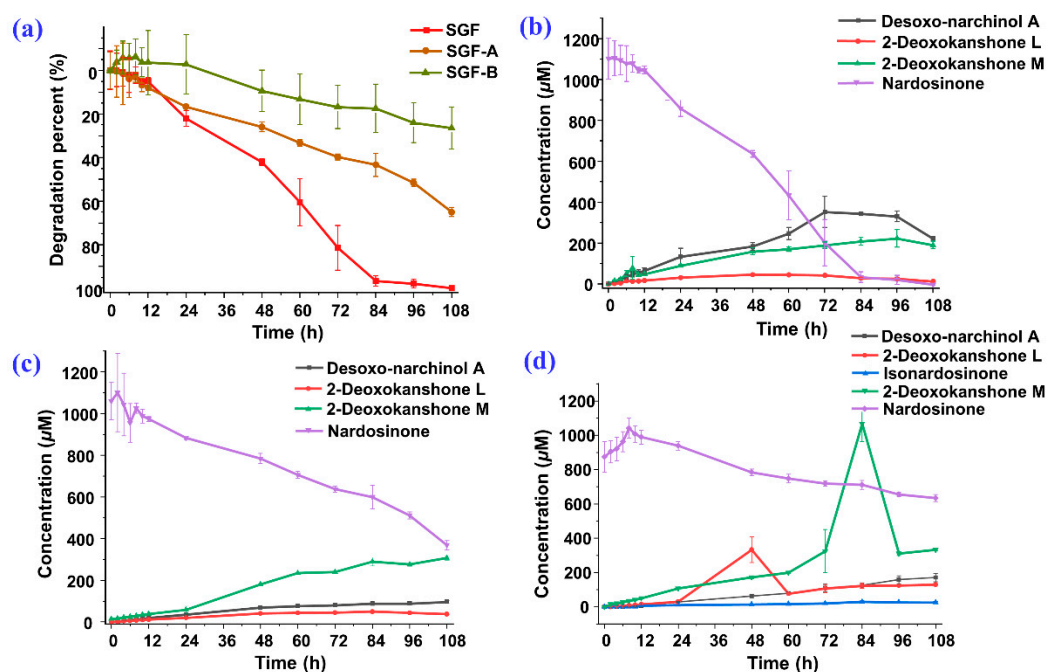

**Figure S9** The degradation rate and dynamic variations of nardosinone and degradation products under three different conditions for 108 h. (a) Degradation percent of nardosinone in three conditions; time-concentration curves of nardosinone and its main degradation products in SGF (b), SGF-A (c), and SGF-B (d)

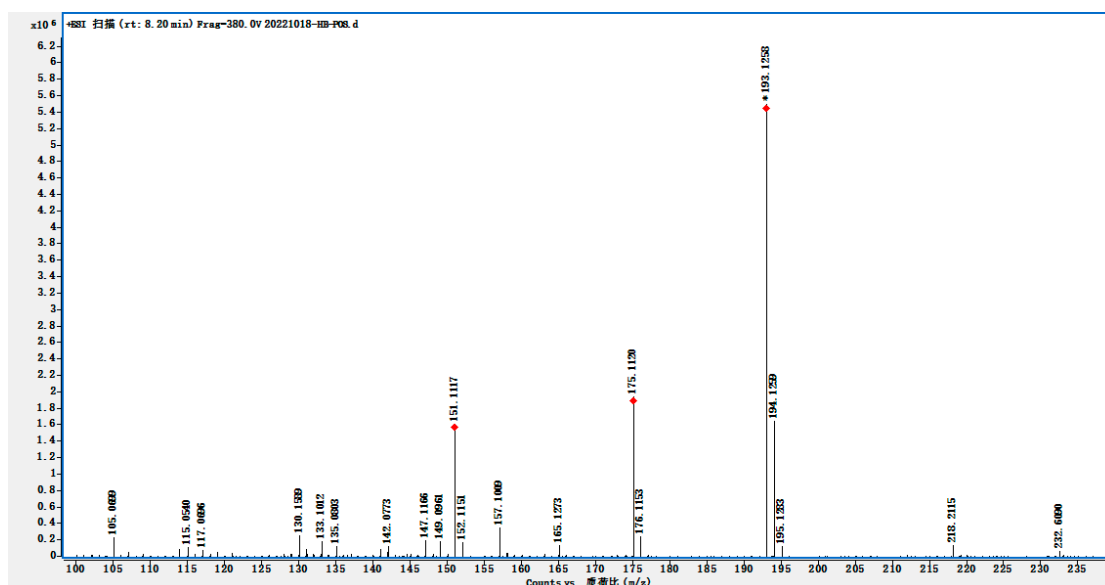

Figure S10 Mass spectrum ion fragment of desoxo-narchinol A

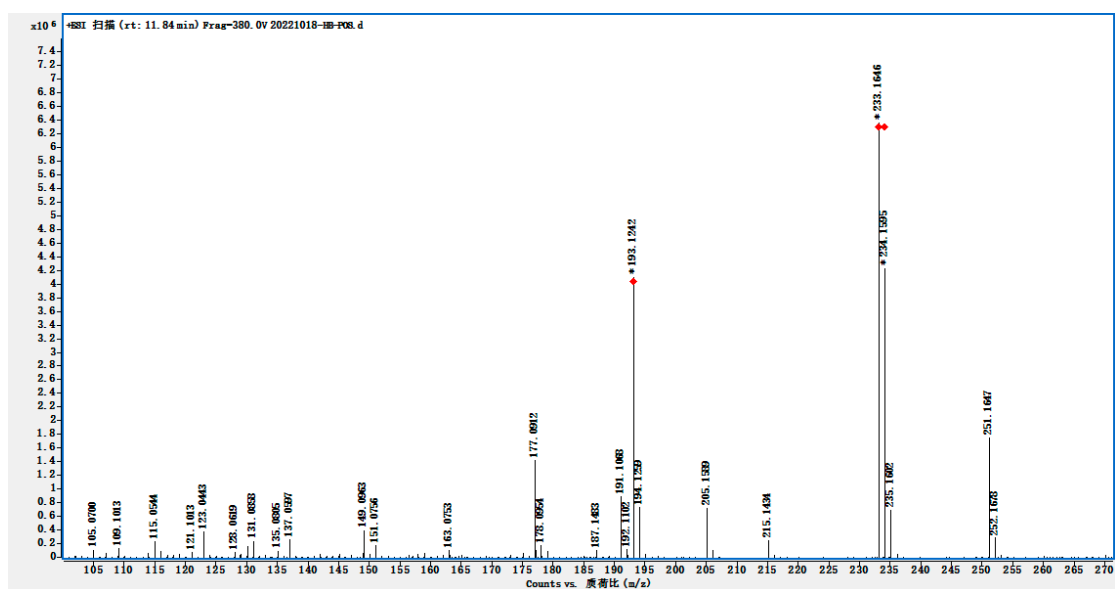

Figure S11 Mass spectrum ion fragment of 2-deoxokanshone L



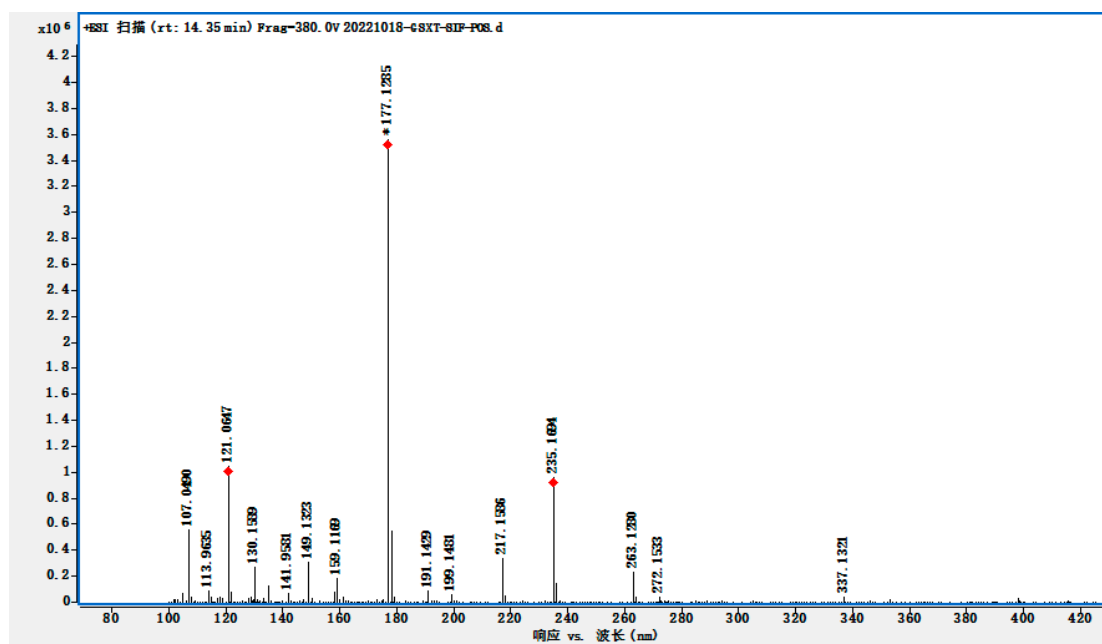

Figure S12 Mass spectrum ion fragment of nardosinonediol

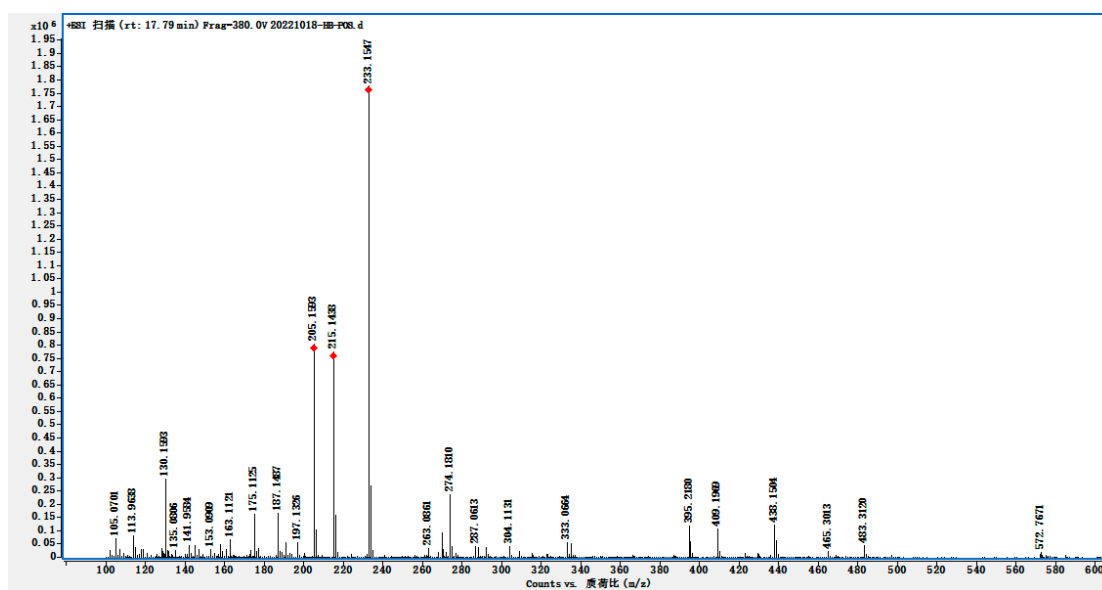

Figure S13 Mass spectrum ion fragment of isonardosinone

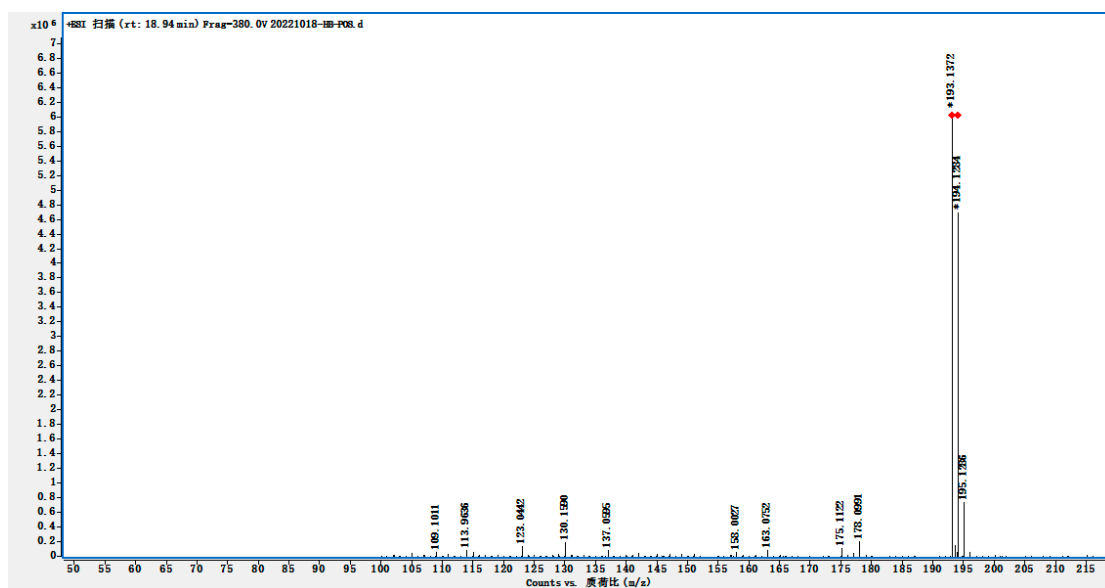

Figure S14 Mass spectrum ion fragment of 2-deoxokanshone M

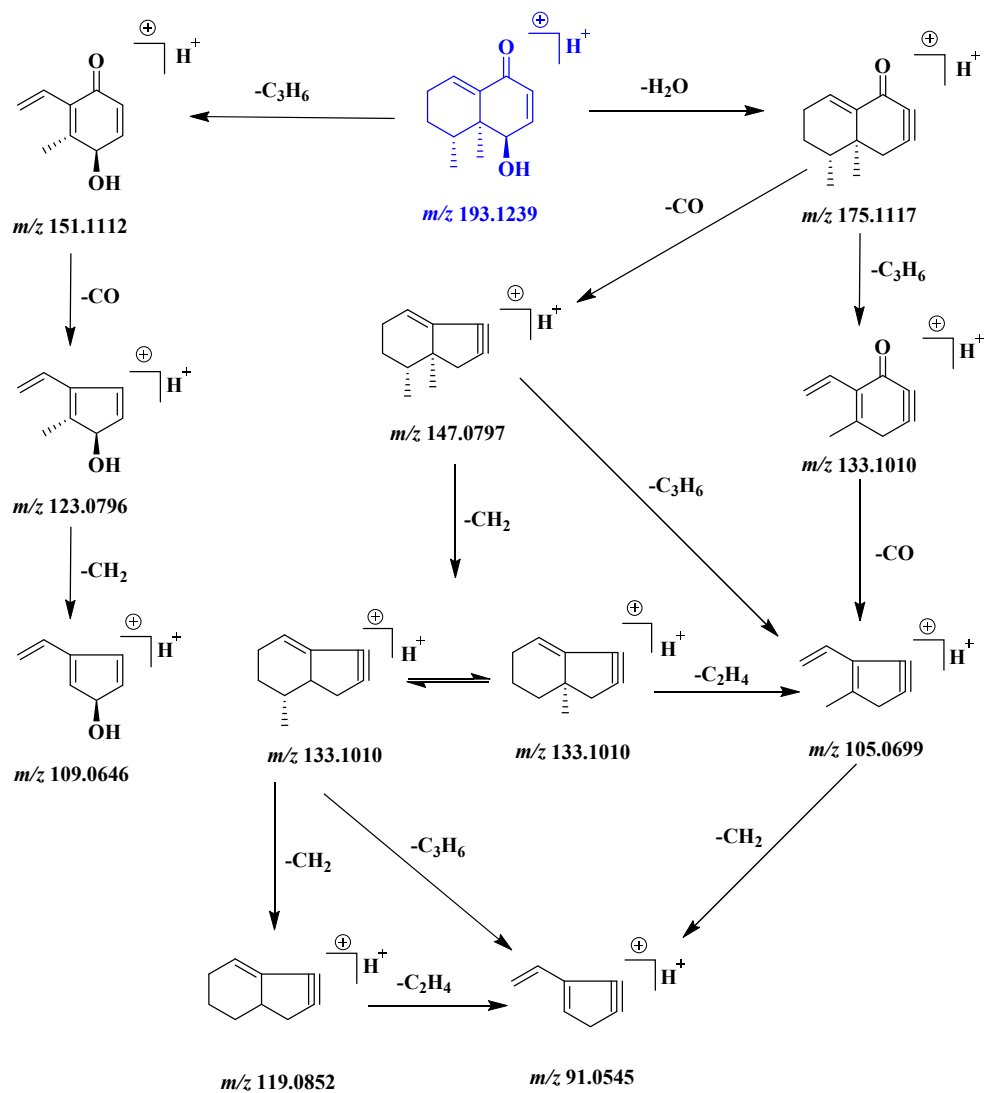

**Figure S15** Mass spectrometry fragmentation pathway of desoxo-narchinol A (positive ion mode)

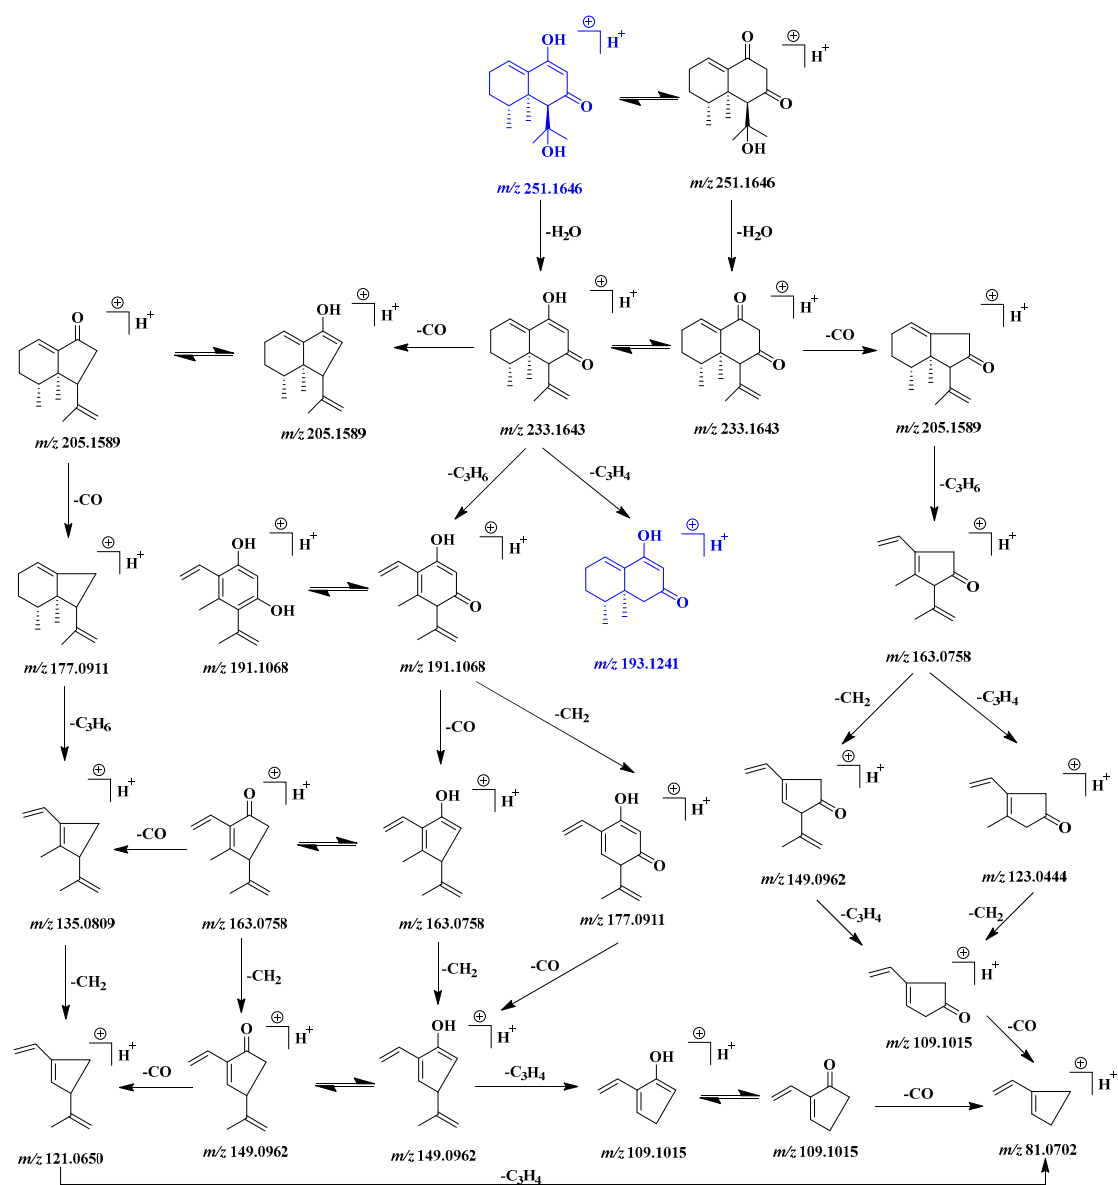

**Figure S16** Mass spectrometry fragmentation pathway of 2-deoxokanshone L (positive ion mode)

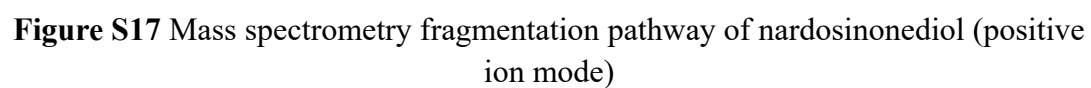

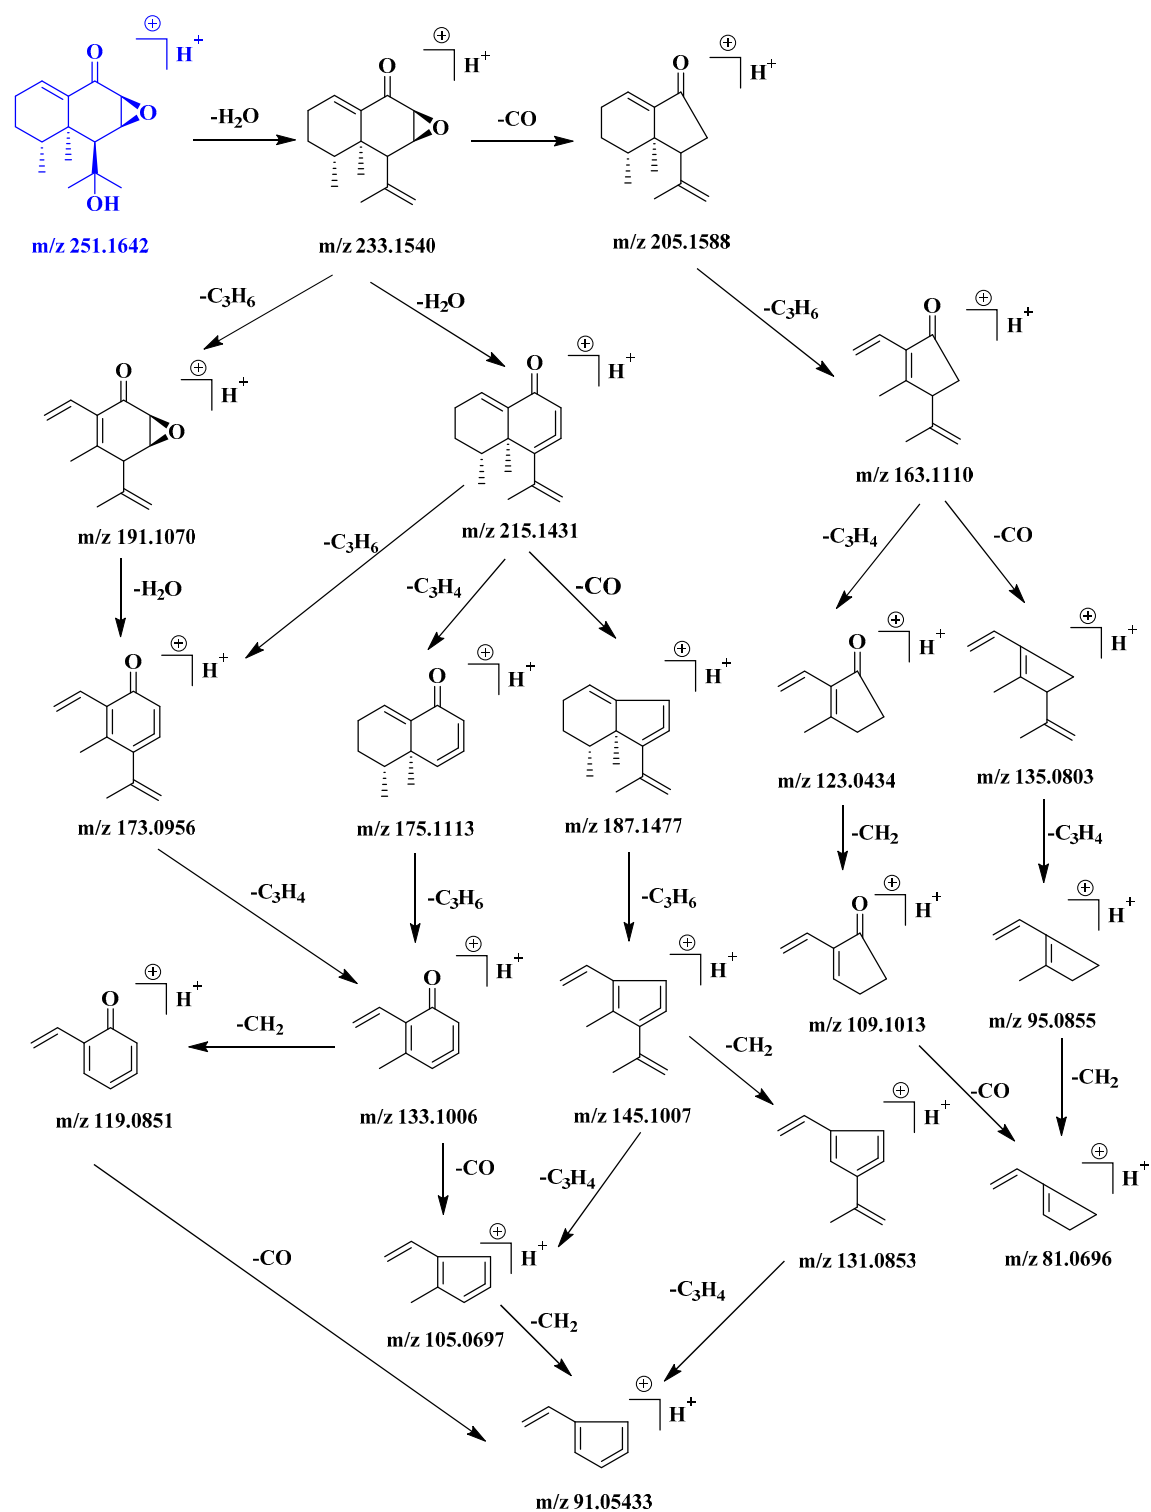

**Figure S18** Mass spectrometry fragmentation pathway of isonardosinone (positive ion mode)

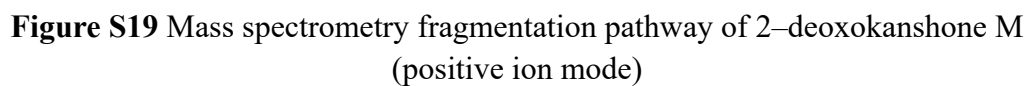

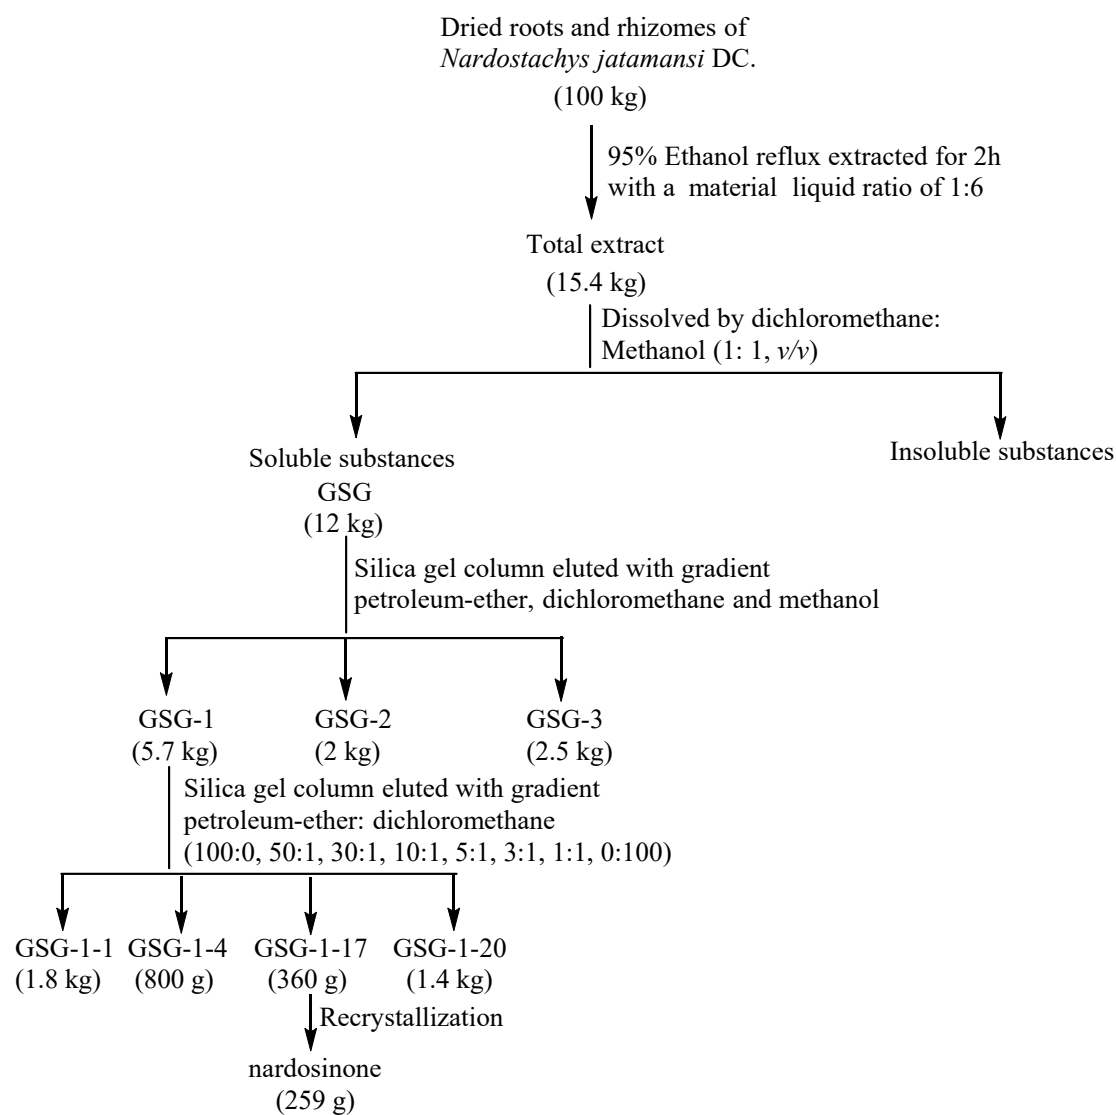

**Figure S20** The separation process diagram of nardosinone



**Table S1** Characterization of nardosinone and its degradation products in three different conditions by using UHPLC–DAD/ESI–Q–TOF MS

| Identification                  | RT<br>(min) | Formula                                        | Molecular<br>weight | Mass ion<br>(MS)                                | Fragments                                                                                                                                                                                                                                                                                                                                                                                                                                                                                                                                                                                                                                                                                                                                                                                                                                                                                                                                                                                                                                              | Source                                 |
|---------------------------------|-------------|------------------------------------------------|---------------------|-------------------------------------------------|--------------------------------------------------------------------------------------------------------------------------------------------------------------------------------------------------------------------------------------------------------------------------------------------------------------------------------------------------------------------------------------------------------------------------------------------------------------------------------------------------------------------------------------------------------------------------------------------------------------------------------------------------------------------------------------------------------------------------------------------------------------------------------------------------------------------------------------------------------------------------------------------------------------------------------------------------------------------------------------------------------------------------------------------------------|----------------------------------------|
| Desoxo-narchinol A ( <b>2</b> ) | 8.22        | C <sub>12</sub> H <sub>16</sub> O <sub>2</sub> | 192.1150            | 193.1239<br>[M+H] <sup>+</sup>                  | 175.1117 [M+H-H <sub>2</sub> O] <sup>+</sup><br>151.1112 [M+H-C <sub>3</sub> H <sub>6</sub> ] <sup>+</sup><br>147.0797 [M+H-H <sub>2</sub> O-CO] <sup>+</sup><br>133.1010 [M+H-H <sub>2</sub> O-CO-CH <sub>2</sub> ] <sup>+</sup> ; [M+H-H <sub>2</sub> O-C <sub>3</sub> H <sub>6</sub> ] <sup>+</sup><br>123.0796 [M+H-C <sub>3</sub> H <sub>6</sub> -CO] <sup>+</sup>                                                                                                                                                                                                                                                                                                                                                                                                                                                                                                                                                                                                                                                                                | HT;<br>SGF;<br>SGF-A;<br>SGF-B;<br>SIF |
| 2–Deoxokanshone L ( <b>3</b> )  | 11.86       | C <sub>15</sub> H <sub>22</sub> O <sub>3</sub> | 250.1569            | 251.1646<br>[M+H] <sup>+</sup>                  | 233.1643 [M+H-H <sub>2</sub> O] <sup>+</sup><br>205.1589 [M+H-H <sub>2</sub> O-CO] <sup>+</sup><br>193.1241 [M+H-H <sub>2</sub> O-C <sub>3</sub> H <sub>4</sub> ] <sup>+</sup><br>191.1068 [M+H-H <sub>2</sub> O-C <sub>3</sub> H <sub>6</sub> ] <sup>+</sup><br>177.0911 [M+H-H <sub>2</sub> O-CO-CO] <sup>+</sup> ; [M+H-H <sub>2</sub> O-C <sub>3</sub> H <sub>6</sub> -CH <sub>2</sub> ] <sup>+</sup><br>163.0758 [M+H-H <sub>2</sub> O-CO-C <sub>3</sub> H <sub>6</sub> ] <sup>+</sup> ;<br>149.0962 [M+H-H <sub>2</sub> O-C <sub>3</sub> H <sub>6</sub> -CO-CH <sub>2</sub> ] <sup>+</sup> ;<br>135.0809 [M+H-H <sub>2</sub> O-CO-CO-C <sub>3</sub> H <sub>6</sub> ] <sup>+</sup> ;<br>123.0444 [M+H-H <sub>2</sub> O-CO-C <sub>3</sub> H <sub>6</sub> -C <sub>3</sub> H <sub>4</sub> ] <sup>+</sup><br>121.0650 [M+H-H <sub>2</sub> O-CO-CO-C <sub>3</sub> H <sub>6</sub> -CH <sub>2</sub> ] <sup>+</sup> ;<br>109.1015 [M+H-H <sub>2</sub> O-C <sub>3</sub> H <sub>6</sub> -CH <sub>2</sub> -CO-C <sub>3</sub> H <sub>4</sub> ] <sup>+</sup> ; | HT;<br>SGF;<br>SGF-A;<br>SGF-B;<br>SIF |
| Nardosinonediol                 | 14.33       | C <sub>15</sub> H <sub>24</sub> O <sub>3</sub> | 252.1725            | 235.1694<br>[M+H-H <sub>2</sub> O] <sup>+</sup> | 217.1585 [M+H-H <sub>2</sub> O-H <sub>2</sub> O] <sup>+</sup><br>177.1258 [M+H-H <sub>2</sub> O-H <sub>2</sub> O-C <sub>3</sub> H <sub>4</sub> ] <sup>+</sup><br>149.0960 [M+H-H <sub>2</sub> O-H <sub>2</sub> O-C <sub>3</sub> H <sub>4</sub> -CO] <sup>+</sup>                                                                                                                                                                                                                                                                                                                                                                                                                                                                                                                                                                                                                                                                                                                                                                                       | SIF                                    |

|                       |       |                                                |          |                                                                     |                                                                                                                                                                                                                                                                                                                                                                                                                                                                                                                                                                                                                                                                                                                                                                                                                                                                              |                                |
|-----------------------|-------|------------------------------------------------|----------|---------------------------------------------------------------------|------------------------------------------------------------------------------------------------------------------------------------------------------------------------------------------------------------------------------------------------------------------------------------------------------------------------------------------------------------------------------------------------------------------------------------------------------------------------------------------------------------------------------------------------------------------------------------------------------------------------------------------------------------------------------------------------------------------------------------------------------------------------------------------------------------------------------------------------------------------------------|--------------------------------|
|                       |       |                                                |          |                                                                     | 135.0805 [M+H-H <sub>2</sub> O-H <sub>2</sub> O-C <sub>3</sub> H <sub>4</sub> -C <sub>3</sub> H <sub>6</sub> ] <sup>+</sup> ;<br>[M+H-H <sub>2</sub> O-H <sub>2</sub> O-C <sub>3</sub> H <sub>4</sub> -CO-CH <sub>2</sub> ] <sup>+</sup>                                                                                                                                                                                                                                                                                                                                                                                                                                                                                                                                                                                                                                     |                                |
|                       |       |                                                |          |                                                                     | 121.0645 [M+H-H <sub>2</sub> O-H <sub>2</sub> O-C <sub>3</sub> H <sub>4</sub> -C <sub>3</sub> H <sub>6</sub> -CH <sub>2</sub> ] <sup>+</sup>                                                                                                                                                                                                                                                                                                                                                                                                                                                                                                                                                                                                                                                                                                                                 |                                |
|                       |       |                                                |          |                                                                     | 107.0852 [M+H-H <sub>2</sub> O-H <sub>2</sub> O-C <sub>3</sub> H <sub>4</sub> -C <sub>3</sub> H <sub>6</sub> -CO] <sup>+</sup> ;<br>[M+H-H <sub>2</sub> O-H <sub>2</sub> O-C <sub>3</sub> H <sub>4</sub> -CO-CH <sub>2</sub> -C <sub>2</sub> H <sub>4</sub> ] <sup>+</sup>                                                                                                                                                                                                                                                                                                                                                                                                                                                                                                                                                                                                   |                                |
| Isonardosinone (4)    | 17.80 | C <sub>15</sub> H <sub>22</sub> O <sub>3</sub> | 250.1569 | 251.1639<br>[M+H] <sup>+</sup>                                      | 233.1540 [M+H-H <sub>2</sub> O] <sup>+</sup><br>215.1431 [M+H-H <sub>2</sub> O-H <sub>2</sub> O] <sup>+</sup><br>205.1588 [M+H-H <sub>2</sub> O-CO] <sup>+</sup><br>187.1477 [M+H-H <sub>2</sub> O-H <sub>2</sub> O-CO] <sup>+</sup><br>175.1113 [M+H-H <sub>2</sub> O-H <sub>2</sub> O-C <sub>3</sub> H <sub>4</sub> ] <sup>+</sup><br>173.0956 [M+H-H <sub>2</sub> O-H <sub>2</sub> O-C <sub>3</sub> H <sub>6</sub> ] <sup>+</sup><br>163.1111 [M+H-H <sub>2</sub> O-CO-C <sub>3</sub> H <sub>6</sub> ] <sup>+</sup><br>135.0803 [M+H-H <sub>2</sub> O-CO-C <sub>3</sub> H <sub>6</sub> -CO] <sup>+</sup><br>133.1006 [M+H-H <sub>2</sub> O-H <sub>2</sub> O-C <sub>3</sub> H <sub>6</sub> -C <sub>3</sub> H <sub>4</sub> ] <sup>+</sup><br>105.0697 [M+H-H <sub>2</sub> O-H <sub>2</sub> O-C <sub>3</sub> H <sub>6</sub> -C <sub>3</sub> H <sub>4</sub> -CO] <sup>+</sup> | HT;<br>SGF-B;<br>SIF           |
| 2-Deoxokanshone M (1) | 18.94 | C <sub>12</sub> H <sub>16</sub> O <sub>2</sub> | 192.1150 | 193.1226<br>[M+H] <sup>+</sup> ;<br>385.2404<br>[2M+H] <sup>+</sup> | 179.1013 [M+H-CH <sub>2</sub> ] <sup>+</sup><br>175.1122 [M+H-H <sub>2</sub> O] <sup>+</sup><br>177.0904 [M+H-CH <sub>4</sub> ] <sup>+</sup><br>163.0754 [M+H-CH <sub>2</sub> -CH <sub>4</sub> ] <sup>+</sup> ; [M+H-CH <sub>4</sub> -CH <sub>2</sub> ] <sup>+</sup><br>151.0753 [M+H-C <sub>3</sub> H <sub>6</sub> ] <sup>+</sup><br>149.0596 [M+H-CH <sub>4</sub> -CO] <sup>+</sup><br>135.0805 [M+H-CH <sub>2</sub> -CH <sub>4</sub> -CO] <sup>+</sup> ; [M+H-CH <sub>4</sub> -CO-CH <sub>2</sub> ] <sup>+</sup><br>123.0440 [M+H-C <sub>3</sub> H <sub>6</sub> -CO] <sup>+</sup>                                                                                                                                                                                                                                                                                         | HT;<br>SGF;<br>SGF-A;<br>SGF-B |

|                 |       |                                                |          |                    |                                                                                                                                                                                                                     |   |
|-----------------|-------|------------------------------------------------|----------|--------------------|---------------------------------------------------------------------------------------------------------------------------------------------------------------------------------------------------------------------|---|
|                 |       |                                                |          |                    | 121.0646 [M+H-CH <sub>4</sub> -CO-CO] <sup>+</sup>                                                                                                                                                                  |   |
|                 |       |                                                |          |                    | 109.1009 [M+H-C <sub>3</sub> H <sub>6</sub> -CO-CH <sub>2</sub> ] <sup>+</sup>                                                                                                                                      |   |
|                 |       |                                                |          |                    | 107.0854 [M+H-CH <sub>4</sub> -CO-CO-CH <sub>2</sub> ] <sup>+</sup> ; [M+H-CH <sub>4</sub> -CO-C <sub>3</sub> H <sub>6</sub> ] <sup>+</sup>                                                                         |   |
| Nardosinone (5) | 28.12 | C <sub>15</sub> H <sub>22</sub> O <sub>3</sub> | 250.1569 | 251.1646           | 233.1542 [M+H-H <sub>2</sub> O] <sup>+</sup>                                                                                                                                                                        | — |
|                 |       |                                                |          | [M+H] <sup>+</sup> | 219.1372 [M+H-H <sub>2</sub> O-CH <sub>2</sub> ] <sup>+</sup>                                                                                                                                                       |   |
|                 |       |                                                |          |                    | 215.1430 [M+H-H <sub>2</sub> O-H <sub>2</sub> O] <sup>+</sup>                                                                                                                                                       |   |
|                 |       |                                                |          |                    | 205.1587 [M+H-H <sub>2</sub> O-CO] <sup>+</sup>                                                                                                                                                                     |   |
|                 |       |                                                |          |                    | 193.1226 [M+H-C <sub>3</sub> H <sub>4</sub> ] <sup>+</sup>                                                                                                                                                          |   |
|                 |       |                                                |          |                    | 191.1429 [M+H-H <sub>2</sub> O-C <sub>3</sub> H <sub>6</sub> ] <sup>+</sup> ; [M+H-H <sub>2</sub> O-CH <sub>2</sub> -CO] <sup>+</sup>                                                                               |   |
|                 |       |                                                |          |                    | 177.0905 [M+H-H <sub>2</sub> O-C <sub>3</sub> H <sub>6</sub> -CH <sub>2</sub> ] <sup>+</sup> ; [M+H-H <sub>2</sub> O-CH <sub>2</sub> -CO-CH <sub>2</sub> ] <sup>+</sup> ; [M+H-H <sub>2</sub> O-CO-CO] <sup>+</sup> |   |
|                 |       |                                                |          |                    | 175.1121 [M+H-C <sub>3</sub> H <sub>4</sub> -H <sub>2</sub> O] <sup>+</sup>                                                                                                                                         |   |
|                 |       |                                                |          |                    | 163.0750 [M+H-H <sub>2</sub> O-C <sub>3</sub> H <sub>6</sub> -CO] <sup>+</sup>                                                                                                                                      |   |
|                 |       |                                                |          |                    | 149.0956 [M+H-H <sub>2</sub> O-CH <sub>2</sub> -CO-CH <sub>2</sub> -C <sub>2</sub> H <sub>4</sub> ] <sup>+</sup> ;                                                                                                  |   |
|                 |       |                                                |          |                    | [M+H-H <sub>2</sub> O-CH <sub>2</sub> -CO-C <sub>3</sub> H <sub>6</sub> ] <sup>+</sup>                                                                                                                              |   |
|                 |       |                                                |          |                    | 135.0801 [M+H-H <sub>2</sub> O-CO-CO-CH <sub>2</sub> -C <sub>2</sub> H <sub>4</sub> ] <sup>+</sup>                                                                                                                  |   |
|                 |       |                                                |          |                    | 123.0440 [M+H-H <sub>2</sub> O-CO-C <sub>3</sub> H <sub>6</sub> -C <sub>3</sub> H <sub>4</sub> ] <sup>+</sup>                                                                                                       |   |
|                 |       |                                                |          |                    | 109.1010 [M+H-H <sub>2</sub> O-CH <sub>2</sub> -CO-CH <sub>2</sub> -C <sub>2</sub> H <sub>4</sub> -C <sub>3</sub> H <sub>4</sub> ] <sup>+</sup> ;                                                                   |   |
|                 |       |                                                |          |                    | [M+H-H <sub>2</sub> O-CH <sub>2</sub> -CO-C <sub>3</sub> H <sub>6</sub> -C <sub>3</sub> H <sub>4</sub> ] <sup>+</sup>                                                                                               |   |

---

**Table S2** The detailed parameters of the NMR measurements

| Name                        | <sup>1</sup> H-NMR | <sup>13</sup> C-NMR | HSQC                     | HMBC                     | <sup>1</sup> H- <sup>1</sup> H COSY |
|-----------------------------|--------------------|---------------------|--------------------------|--------------------------|-------------------------------------|
| Number of Scans (NS)        | 16                 | 2838                | 16                       | 32                       | 16                                  |
| Receiver Gain (RG)          | 31.78              | 55.56               | 188.54                   | 188.54                   | 188.54                              |
| Relaxation Delay (RD/D1)    | 1.0 s              | 2.0 s               | 1.5 s                    | 1.5 s                    | 2.0 s                               |
| Spectral Width (SWH)        | 12019.23 Hz        | 36231.9 Hz          | 12019.23 Hz, 36231.9 Hz  | 12019.23 Hz, 36231.9 Hz  | 12019.23 Hz, 11990.4 Hz             |
| Acquisition Time (AQ)       | 2.7263 s           | 0.9044 s            | 0.0573 s                 | 0.1704 s                 | 0.0852 s                            |
| Spectrometer Frequency (SF) | 600.20 MHz         | 150.95 MHz          | 600.20 MHz, 150.94 MHz   | 600.20 MHz, 150.94 MHz   | 600.21 MHz, 600.21 MHz              |
| Pulse Width (P1)            | 9.23 $\mu$ s       | 10 $\mu$ s          | 9.23 $\mu$ s, 10 $\mu$ s | 9.23 $\mu$ s, 10 $\mu$ s | 9.23 $\mu$ s                        |
| Line broadening (LB)        | 0.3 Hz             | 1 Hz                | 0 Hz                     | 0 Hz                     | 0 Hz                                |
| Nucleus for channel (NUC1)  | 1 H                | 13 C                | 1 H, 13 C                | 1 H, 13 C                | 1 H, 1 H                            |
| Time domain size (TD)       | 65536              | 65536               | 1024                     | 4096                     | 2048                                |
| Number of dummy scans (DS)  | 0                  | 0                   | 16                       | 16                       | 16                                  |
| Dwell time (DW)             | 41.6 $\mu$ s       | 13.8 $\mu$ s        | 56 $\mu$ s               | 41.6 $\mu$ s             | 41.6 $\mu$ s                        |
| Pre-scan-delay (DE)         | 10 $\mu$ s         | 18.0 $\mu$ s        | 10 $\mu$ s               | 10 $\mu$ s               | 10 $\mu$ s                          |
| PLW1                        | 25.4480 W          | 24.194 W            | 25.4480 W, 24.194 W      | 25.4480 W, 24.194 W      | 25.4480 W                           |
| SI                          | 65536              | 65536               | 1024, 1024               | 4096, 1024               | 1024, 1024                          |
| FID resolution (FIDRES)     | 0.367 Hz           | 1.106 Hz            | 17.439 Hz                | 5.859 Hz                 | 11.738 Hz                           |
| PC                          | 1                  | 1.4                 | 1.4                      | 1.4                      | 1.4                                 |
